# Supplementary material for: Protein synthesis yield increased 72 times in the cell-free PURE system
Source: Royal Society of Chemistry journal article supplement (doi:10.1039/c4ib00088a), 2014-07-10
Supplement: c4ib00088a1.pdf [file c4ib00088a1.pdf]

## Protein Synthesis Yield Increased 72 Times in the Cell-Free PURE System

Kirsten Jackson<sup>1</sup>, Takashi Kanamori<sup>2</sup>, Takuya Ueda<sup>3\*</sup>, & Z. Hugh Fan<sup>1,4,5,\*</sup>

Email: hfan@ufl.edu

### Electronic Supplementary Data

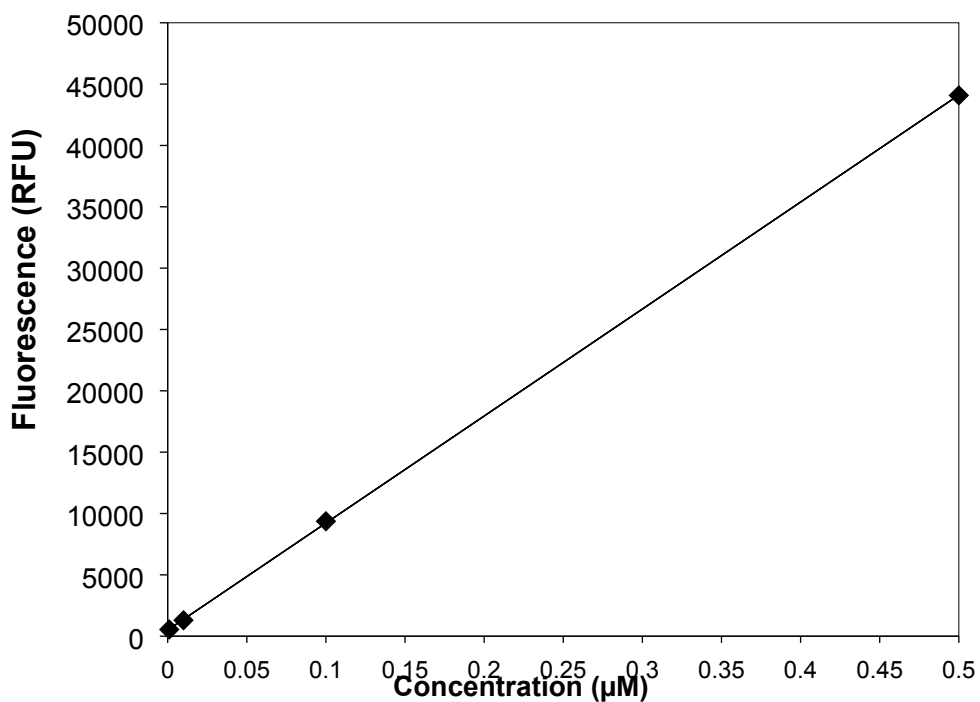

**Supplementary Figure S1.** Calibration curve and trendline for purified recombinant GFP (rGFP). The concentration of rGFP was varied from 1 nM to 0.5 μM, and the resulting fluorescence signal was measured. A simple linear regression was then performed to determine the equation of the trendline and coefficient of determination ( $R^2$  value) for the resulting data.
